# Supplementary material for: Comparative Phylogeography in Fijian Coral Reef Fishes: A Multi-Taxa Approach towards Marine Reserve Design
Source: PubMed Central journal article supplement (PMC3484158; doi:10.1371/journal.pone.0047710), 2012-10-30
Supplement: pone.0047710.s001.pdf [file pone.0047710.s001.pdf]

| Species:                            | Migration pattern:                 | 2.50% | 25.00% | Mode  | 75.00% | 97.50% | Median | Mean  |
|-------------------------------------|------------------------------------|-------|--------|-------|--------|--------|--------|-------|
| <i>Amblyglyphidodon orbicularis</i> | Eastern Islands->Vanua Levu        | 0     | 0      | 52.5  | 217    | 612    | 217.5  | 250.8 |
|                                     | Eastern Islands->Viti Levu         | 0     | 0      | 0.5   | 100    | 419    | 100.5  | 146   |
|                                     | Eastern Islands->Western Islands   | 0     | 0      | 0.5   | 61     | 376    | 61.5   | 113.9 |
|                                     | Vanua Levu->Eastern Islands        | 0     | 0      | 0.5   | 71     | 470    | 71.5   | 123.8 |
|                                     | Vanua Levu->Viti Levu              | 0     | 0      | 0.5   | 61     | 369    | 61.5   | 107   |
|                                     | Vanua Levu->Western Islands        | 0     | 0      | 5.5   | 46     | 183    | 46.5   | 63.9  |
|                                     | Viti Levu->Eastern Islands         | 0     | 0      | 0.5   | 95     | 473    | 95.5   | 149.9 |
|                                     | Viti Levu->Vanua Levu              | 0     | 0      | 0.5   | 131    | 514    | 131.5  | 177.8 |
|                                     | Viti Levu->Western Islands         | 0     | 0      | 0.5   | 104    | 462    | 104.5  | 152.5 |
|                                     | Western Islands->Eastern Islands   | 0     | 0      | 34.5  | 160    | 511    | 160.5  | 198.3 |
|                                     | Western Islands->Vanua Levu        | 0     | 39     | 103.5 | 249    | 608    | 214.5  | 250.3 |
| Western Islands->Viti Levu          | 0                                  | 0     | 23.5   | 114   | 636    | 241.5  | 266.6  |       |
| <i>Amphiprion barberi</i>           | Eastern Islands->Vanua Levu        | 0     | 0      | 0.6   | 272.4  | 789.6  | 273    | 316.7 |
|                                     | Eastern Islands->Viti Levu         | 0     | 57.6   | 208.2 | 354    | 843.6  | 309    | 352.7 |
|                                     | Eastern Islands->Western Islands   | 0     | 0      | 0.6   | 87.6   | 770.4  | 289.8  | 322.1 |
|                                     | Vanua Levu->Eastern Islands        | 0     | 0      | 0.6   | 99.6   | 379.2  | 100.2  | 134.6 |
|                                     | Vanua Levu->Viti Levu              | 0     | 0      | 0.6   | 148.8  | 880.8  | 149.4  | 251.3 |
|                                     | Vanua Levu->Western Islands        | 0     | 0      | 0.6   | 86.4   | 560.4  | 87     | 156.3 |
|                                     | Viti Levu->Eastern Islands         | 0     | 0      | 0.6   | 90     | 420    | 90.6   | 136.9 |
|                                     | Viti Levu->Vanua Levu              | 0     | 0      | 0.6   | 162    | 894    | 162.6  | 266.6 |
|                                     | Viti Levu->Western Islands         | 0     | 0      | 0.6   | 81.6   | 640.8  | 82.2   | 162   |
|                                     | Western Islands->Eastern Islands   | 0     | 0      | 35.4  | 130.8  | 604.8  | 131.4  | 194.1 |
|                                     | Western Islands->Vanua Levu        | 0     | 0      | 0.6   | 212.4  | 868.8  | 213    | 294.2 |
| Western Islands->Viti Levu          | 0                                  | 0     | 0.6    | 241.2 | 952.8  | 241.8  | 329.5  |       |
| <i>Chrysiptera talboti</i>          | Eastern Islands->Vanua Levu        | 223   | 686    | 980.5 | 994    | 1000   | 693.5  | 637.1 |
|                                     | Eastern Islands->Viti Levu         | 151   | 514    | 674.5 | 875    | 1000   | 620.5  | 597   |
|                                     | Eastern Islands->Western Islands   | 236   | 662    | 962.5 | 992    | 1000   | 671.5  | 619.6 |
|                                     | Vanua Levu->Eastern Islands        | 0     | 127    | 278.5 | 590    | 937    | 471.5  | 482.1 |
|                                     | Vanua Levu->Viti Levu              | 0     | 0      | 89.5  | 360    | 899    | 360.5  | 403.5 |
|                                     | Vanua Levu->Western Islands        | 0     | 7      | 167.5 | 422    | 788    | 414.5  | 446.8 |
|                                     | Viti Levu->Eastern Islands         | 0     | 0      | 0.5   | 283    | 871    | 283.5  | 344.9 |
|                                     | Viti Levu->Vanua Levu              | 0     | 0      | 0.5   | 157    | 722    | 157.5  | 231.6 |
|                                     | Viti Levu->Western Islands         | 0     | 0      | 0.5   | 188    | 749    | 188.5  | 257.7 |
|                                     | Western Islands->Eastern Islands   | 0     | 41     | 224.5 | 499    | 925    | 460.5  | 474.2 |
|                                     | Western Islands->Vanua Levu        | 0     | 0      | 0.5   | 411    | 663    | 412.5  | 446.6 |
| Western Islands->Viti Levu          | 0                                  | 51    | 150.5  | 439   | 904    | 393.5  | 426.7  |       |
| <i>Halichoeres hortulanus</i>       | Eastern Islands -> Vanua Levu      | 0     | 0      | 0.6   | 192    | 846    | 192.6  | 227.4 |
|                                     | Eastern Islands -> Viti Levu       | 0     | 0      | 0.6   | 273.6  | 975.6  | 274.2  | 276.5 |
|                                     | Eastern Islands -> Western Islands | 0     | 0      | 29.4  | 247.2  | 862.8  | 247.8  | 470.4 |
|                                     | Vanua Levu -> Eastern Islands      | 0     | 0      | 0.6   | 141.6  | 759.6  | 142.2  | 280   |
|                                     | Vanua Levu -> Viti Levu            | 0     | 0      | 21    | 212.4  | 937.2  | 213    | 260   |
|                                     | Vanua Levu -> Western Islands      | 0     | 0      | 0.6   | 229.2  | 854.4  | 229.8  | 474.3 |
|                                     | Viti Levu -> Eastern Islands       | 0     | 0      | 0.6   | 168    | 907.2  | 168.6  | 360.3 |
|                                     | Viti Levu -> Vanua Levu            | 0     | 0      | 29.4  | 169.2  | 811.2  | 169.8  | 311.9 |
|                                     | Viti Levu -> Western Islands       | 0     | 0      | 0.6   | 214.8  | 802.8  | 215.4  | 368.1 |
|                                     | Western Islands -> Eastern Islands | 0     | 0      | 0.6   | 184.8  | 1032   | 451.8  | 319   |
|                                     | Western Islands -> Vanua Levu      | 0     | 339.6  | 517.8 | 662.4  | 980.4  | 468.6  | 305.2 |
| Western Islands -> Viti Levu        | 0                                  | 0     | 0.6    | 309.6 | 943.2  | 310.2  | 283.9  |       |
| <i>Pomacentrus maafu</i>            | Eastern Islands -> Vanua Levu      | 0     | 0      | 0.6   | 139.2  | 963.6  | 139.8  | 290.1 |
|                                     | Eastern Islands -> Viti Levu       | 0     | 0      | 0.6   | 404.4  | 1086   | 441    | 476.9 |
|                                     | Eastern Islands -> Western Islands | 0     | 0      | 0.6   | 158.4  | 866.4  | 159    | 255.2 |
|                                     | Vanua Levu -> Eastern Islands      | 0     | 0      | 31.8  | 409.2  | 1053.6 | 411    | 458.2 |
|                                     | Vanua Levu -> Viti Levu            | 0     | 0      | 0.6   | 144    | 1045.2 | 437.4  | 459.3 |
|                                     | Vanua Levu -> Western Islands      | 0     | 0      | 0.6   | 184.8  | 316.8  | 403.8  | 469   |
|                                     | Viti Levu -> Eastern Islands       | 0     | 0      | 0.6   | 356.4  | 1052.4 | 357    | 429.3 |
|                                     | Viti Levu -> Vanua Levu            | 0     | 0      | 0.6   | 127.2  | 861.6  | 127.8  | 249.4 |
|                                     | Viti Levu -> Western Islands       | 0     | 0      | 0.6   | 180    | 1017.6 | 180.6  | 328.4 |
|                                     | Western Islands -> Eastern Islands | 0     | 0      | 0.6   | 392.4  | 1023.6 | 393    | 437.4 |
|                                     | Western Islands -> Vanua Levu      | 0     | 0      | 18.6  | 210    | 954    | 210.6  | 328.9 |
| Western Islands -> Viti Levu        | 0                                  | 0     | 0.6    | 302.4 | 1014   | 330.6  | 387.5  |       |
